# Supplementary material
Source: PubMed Central journal article supplement (PMC5710440)
Supplement: jamainternmed-177-1102-s001.pdf [file jamainternmed-177-1102-s001.pdf]

## Supplementary Online Content

Sudore RL, Boscardin, Feuz MA, McMahan RD, Katen MT, Barnes DE. Effect of the PREPARE website vs an easy-to-read advance directive on advance care planning documentation and engagement among veterans: a randomized clinical trial. *JAMA Intern Med*. Published online May 18, 2017. doi:10.1001/jamainternmed.2017.1607

### **eTable.** Reasons for withdrawal

This supplementary material has been provided by the authors to give readers additional information about their work.

**e-Table 1: Reasons for Withdrawal**

| Reason                      | PREPARE Plus AD | AD-Along | <i>P</i> value      |
|-----------------------------|-----------------|----------|---------------------|
|                             | (n=9)           | (n=9)    |                     |
| Lost Interest, No. (%)      | 6 (33.3)        | 6 (33.3) | 0.7176 <sup>a</sup> |
| Too Sick, No. (%)           | 1 (5.6)         | 1 (5.6)  |                     |
| Study too long, No. (%)     | 0 (0)           | 1 (5.6)  |                     |
| No reason provided, No. (%) | 2 (11.1)        | 1 (5.6)  |                     |

<sup>a</sup>Fisher's Exact Test
